# Supplementary material for: Feasibility and effectiveness of tools that support communication and decision making in life-prolonging treatments for patients in hospital: a systematic review
Source: PubMed Central journal article supplement — BMJ Support Palliat Care. 2020 Oct 5;12(3):262–9. doi: 10.1136/bmjspcare-2020-002284 (PMC9411882; doi:10.1136/bmjspcare-2020-002284), 2020-10-05
Supplement: bmjspcare-2020-002284supp002.pdf [file bmjspcare-2020-002284supp002.pdf]

**Supplemental material 2 - Search strategies**

Supplementary material to manuscript *Feasibility and effectiveness of tools that support communication and decision making in life-prolonging treatments for patients in hospital: a systematic review*

Authors: Maureen Thodé MSc, H. Roeline W. Pasman PhD, Liesbeth M. van Vliet PhD, Olga C. Damman PhD, Johannes C.F. Ket, Anneke L. Francke PhD, Irene P. Jongerden PhD

**Search strategy for PubMed (11 December 2018)**

| Search | Query                                                                                                                                                                                                                                                                                                                                                                                                                                                                                                                                                                                                                                                                                                                                                                                                                                                                                                                                                              | Items found |
|--------|--------------------------------------------------------------------------------------------------------------------------------------------------------------------------------------------------------------------------------------------------------------------------------------------------------------------------------------------------------------------------------------------------------------------------------------------------------------------------------------------------------------------------------------------------------------------------------------------------------------------------------------------------------------------------------------------------------------------------------------------------------------------------------------------------------------------------------------------------------------------------------------------------------------------------------------------------------------------|-------------|
| #8     | (#7 NOT (("Adolescent"[Mesh] OR "Child"[Mesh] OR "Infant"[Mesh] OR adolescen*[tiab] OR child*[tiab] OR schoolchild*[tiab] OR infant*[tiab] OR girl*[tiab] OR boy*[tiab] OR teen[tiab] OR teens[tiab] OR teenager*[tiab] OR youth*[tiab] OR pediatr*[tiab] OR paediatr*[tiab] OR puber*[tiab]) NOT ("Adult"[Mesh] OR adult*[tiab] OR man[tiab] OR men[tiab] OR woman[tiab] OR women[tiab])))                                                                                                                                                                                                                                                                                                                                                                                                                                                                                                                                                                        | 3,603       |
| #7     | (#1 AND #2 AND #3 AND (#4 OR #5 OR #6))                                                                                                                                                                                                                                                                                                                                                                                                                                                                                                                                                                                                                                                                                                                                                                                                                                                                                                                            | 3,961       |
| #6     | "Life Support Care"[Mesh] OR "Cardiopulmonary Resuscitation"[Mesh] OR "Life Support Systems"[Mesh] OR "Nutritional Support"[Mesh] OR life support*[tiab] OR resuscitat*[tiab] OR nutritional support*[tiab] OR ((parenteral*[tiab] OR enteral*[tiab] OR artificial*[tiab] OR force*[tiab] OR tube[tiab] OR tubes[tiab] OR intravenous*[tiab]) AND (feeding*[tiab] OR nutrition*[tiab]))                                                                                                                                                                                                                                                                                                                                                                                                                                                                                                                                                                            | 151,570     |
| #5     | "Frail Elderly"[Mesh] OR (("Comorbidity"[Mesh] OR frail*[tiab] OR vulnerab*[tiab] OR multimorbid*[tiab] OR comorb*[tiab]) AND ("Aged"[Mesh] OR "Aged, 80 and over"[Mesh] OR "Frail Elderly"[Mesh] OR "Geriatrics"[Mesh] OR "Geriatric Psychiatry"[Mesh] OR "Geriatric Nursing"[Mesh] OR "Geriatric Dentistry"[Mesh] OR "Dental Care for Aged"[Mesh] OR "Health Services for the Aged"[Mesh] OR elder*[tw] OR eldest[tw] OR frail*[tw] OR geriatri*[tw] OR old age*[tw] OR oldest old*[tw] OR senior*[tw] OR senium[tw] OR very old*[tw] OR septuagenarian*[tw] OR octagenarian*[tw] OR octogenarian*[tw] OR nonagenarian*[tw] OR centarian*[tw] OR centenarian*[tw] OR supercentenarian*[tw] OR older people[tw] OR older subject*[tw] OR older patient*[tw] OR older age*[tw] OR older adult*[tw] OR older man[tw] OR older men[tw] OR older male*[tw] OR older woman[tw] OR older women[tw] OR older female*[tw] OR older population*[tw] OR older person*[tw])) | 118,203     |
| #4     | cancer[sb] OR "Pulmonary Disease, Chronic Obstructive"[Mesh] OR Chronic Obstructive Pulmonary Disease*[tiab] OR copd*[tiab] OR Chronic Bronchiti*[tiab] OR emphysema*[tiab] OR "Heart Diseases"[Mesh] OR "Cardiovascular Diseases"[Mesh] OR "Neovascularization, Physiologic"[Mesh] OR "Collateral Circulation"[Mesh] OR cardiovascul*[tiab] OR heart[tiab] OR vascular*[tiab] OR cardiac[tiab] OR myocard*[tiab] OR coronary[tiab] OR coronaries[tiab] OR angina pectoris[tiab] OR (collateral[tiab] AND circulation[tiab]) OR "Arteriosclerosis"[Mesh] OR "Atherosclerosis"[Mesh] OR atherosclero*[tiab] OR arteriosclero*[tiab] OR "Renal Insufficiency, Chronic"[Mesh] OR esrd[tiab] OR eskd[tiab] OR ((renal*[tiab] OR kidney*[tiab]) AND (insufficien*[tiab] OR failur*[tiab] OR disease*[tiab])) OR "Kidney Diseases"[Mesh] OR "Stroke"[Mesh] OR cva[tiab] OR cvas[tiab] OR                                                                                 | 9,164,358   |

|    |                                                                                                                                                                                                                                                                                                                                                                                                                                                                                                                                                                                                                                                                                                                                                                                                                                                                                           |           |
|----|-------------------------------------------------------------------------------------------------------------------------------------------------------------------------------------------------------------------------------------------------------------------------------------------------------------------------------------------------------------------------------------------------------------------------------------------------------------------------------------------------------------------------------------------------------------------------------------------------------------------------------------------------------------------------------------------------------------------------------------------------------------------------------------------------------------------------------------------------------------------------------------------|-----------|
|    | poststroke*[tiab] OR stroke*[tiab] OR apoplex*[tiab] OR ((brain*[tiab] OR cerebr*[tiab] OR cerebell*[tiab] OR intracran*[tiab] OR intracerebral*[tiab] OR vertebrobasilar*[tiab]) AND (vascular*[tiab]) AND (disease*[tiab] OR accident*[tiab] OR disorder*[tiab])) OR (cerebrovascular*[tiab] AND (disease[tiab] OR diseases[tiab] OR accident*[tiab] OR disorder*[tiab])) OR ((brain*[tiab] OR cerebr*[tiab] OR cerebell*[tiab] OR intracran*[tiab] OR intracerebral*[tiab] OR vertebrobasilar*[tiab]) AND (haemorrhag*[tiab] OR hemorrhag*[tiab] OR ischemi*[tiab] OR ischaemi*[tiab] OR infarct*[tiab] OR haematoma*[tiab] OR hematoma*[tiab] OR bleed*[tiab])) OR "Parkinsonian Disorders"[Mesh] OR parkinson*[tiab] OR serious illness*[tiab]                                                                                                                                       |           |
| #3 | "Hospice and Palliative Care Nursing"[Mesh] OR "Palliative Medicine"[Mesh] OR "Palliative Care"[Mesh] OR "Terminal Care"[Mesh] OR "Hospices"[Mesh] OR palliati*[tiab] OR terminal*[tiab] OR "end of life"[tiab] OR "limited life"[tiab] OR dying*[tiab] OR life threaten*[tiab] OR life end[tiab] OR life ending[tiab] OR life ended[tiab] OR life ends[tiab] OR "last stage of life"[tiab] OR incurabl*[tiab] OR hospice*[tiab]                                                                                                                                                                                                                                                                                                                                                                                                                                                          | 668,609   |
| #2 | "Health personnel"[Mesh] OR "Attitude of health personnel"[Mesh] OR "Professional Role"[Mesh] OR health care worker*[tiab] OR health care professional*[tiab] OR "health care staff"[tiab] OR physician*[tiab] OR medical speciali*[tiab] OR doctor*[tiab] OR nurse[tiab] OR nurses[tiab] OR nursing*[tiab] OR surgeon*[tiab] OR oncologist*[tiab] OR geriatrist*[tiab] OR internist*[tiab] OR gynaecologist*[tiab] OR gynecologist*[tiab] OR obstetrician*[tiab] OR intensivist*[tiab] OR neurologist*[tiab] OR paediatrician*[tiab] OR pediatrician*[tiab] OR cardiologist*[tiab] OR pulmonologist*[tiab] OR orthopaedic*[tiab] OR orthopedic*[tiab] OR urologist*[tiab] OR resident*[tiab] OR medical student*[tiab] OR residency[tiab] OR residencies[tiab] OR intern[tiab] OR interns[tiab] OR internship*[tiab] OR house staff*[tiab] OR psychologist*[tiab] OR psychiatrist*[tiab] | 1,643,982 |
| #1 | ("Decision Making"[Mesh] OR "Decision Support Techniques"[Mesh] OR decision making[tiab] OR decision aid*[tiab] OR choice behavior*[tiab] OR choice behaviour*[tiab] OR decisionmaking*[tiab] OR shared decision*[tiab] OR medical decision*[tiab] OR treatment decision*[tiab] OR clinical decision*[tiab])                                                                                                                                                                                                                                                                                                                                                                                                                                                                                                                                                                              | 352,146   |

### Search strategy for Ebsco/CINAHL (11 December 2018)

| Search | Query                                                                                                                                                                                                                                                                                                                                                                                                                                                                       | Items found |
|--------|-----------------------------------------------------------------------------------------------------------------------------------------------------------------------------------------------------------------------------------------------------------------------------------------------------------------------------------------------------------------------------------------------------------------------------------------------------------------------------|-------------|
| S17    | S16 NOT ((MH ("Adolescence" OR "Child+") OR TI (adolescen* OR child* OR schoolchild* OR infant* OR girl* OR boy* OR teen OR teens OR teenager* OR youth* OR pediater* OR paediatric* OR puber*)) OR AB (adolescen* OR child* OR schoolchild* OR infant* OR girl* OR boy* OR teen OR teens OR teenager* OR youth* OR pediater* OR paediatric* OR puber*)) NOT (MH ("Adult+") OR TI (adult* OR man OR men OR woman OR women) OR AB (adult* OR man OR men OR woman OR women))) | 1,472       |
| S16    | S1 AND S2 AND S3 AND S15                                                                                                                                                                                                                                                                                                                                                                                                                                                    | 1,565       |
| S15    | S4 OR S5 OR S6 OR S7 OR S8 OR S9 OR S10 OR S13 OR S14                                                                                                                                                                                                                                                                                                                                                                                                                       | 1,357,262   |
| S14    | MH "Life Support Care+" OR MH "Advanced Cardiac Life Support+" OR MH "Resuscitation, Cardiopulmonary" OR MH "Nutritional Support" OR MH "Enteral Nutrition" OR MH "Parenteral Nutrition+" OR TI ("life support*" OR                                                                                                                                                                                                                                                         | 52,108      |

|            |                                                                                                                                                                                                                                                                                                                                                                                                                                                                                                                                                                                                                                                                                                                                                                                                                                                                                                                                                                                                                                                                                                                                                                                                                                               |                |
|------------|-----------------------------------------------------------------------------------------------------------------------------------------------------------------------------------------------------------------------------------------------------------------------------------------------------------------------------------------------------------------------------------------------------------------------------------------------------------------------------------------------------------------------------------------------------------------------------------------------------------------------------------------------------------------------------------------------------------------------------------------------------------------------------------------------------------------------------------------------------------------------------------------------------------------------------------------------------------------------------------------------------------------------------------------------------------------------------------------------------------------------------------------------------------------------------------------------------------------------------------------------|----------------|
|            | resuscitat* OR "nutritional support*" OR ((parenteral* OR enteral* OR artificial* OR force* OR tube OR tubes OR intravenous*) AND (feeding* OR nutrition*)) OR AB ("life support*" OR resuscitat* OR "nutritional support*" OR ((parenteral* OR enteral* OR artificial* OR force* OR tube OR tubes OR intravenous*) AND (feeding* OR nutrition*)))                                                                                                                                                                                                                                                                                                                                                                                                                                                                                                                                                                                                                                                                                                                                                                                                                                                                                            |                |
| <b>S13</b> | S11 OR S12                                                                                                                                                                                                                                                                                                                                                                                                                                                                                                                                                                                                                                                                                                                                                                                                                                                                                                                                                                                                                                                                                                                                                                                                                                    | <b>50,186</b>  |
| <b>S12</b> | ( MH "Comorbidity" OR TI (frail* OR vulnerab* OR multimorbid* OR comorb*) OR AB (frail* OR vulnerab* OR multimorbid* OR comorb*) ) AND ( (MH "Aged+" OR MH "Gerontologic Nursing+" OR MH "Geriatrics" OR MH "Geriatric Psychiatry" OR MH "Health Services for the Aged" OR TI (elder* OR eldest OR frail* OR geriatri* OR old age* OR oldest old* OR senior* OR senium OR "very old*" OR septuagenarian* OR octagenarian* OR octogenarian* OR nonagenarian* OR centarian* OR centenarian* OR supercentenarian* OR "older people" OR "older subject*" OR "older patient*" OR "older age*" OR "older adult*" OR "older man" OR "older men" OR "older male*" OR "older woman" OR "older women" OR "older female*" OR "older population*" OR "older person*") OR AB (elder* OR eldest OR frail* OR geriatri* OR old age* OR oldest old* OR senior* OR senium OR "very old*" OR septuagenarian* OR octagenarian* OR octogenarian* OR nonagenarian* OR centarian* OR centenarian* OR supercentenarian* OR "older people" OR "older subject*" OR "older patient*" OR "older age*" OR "older adult*" OR "older man" OR "older men" OR "older male*" OR "older woman" OR "older women" OR "older female*" OR "older population*" OR "older person*") ) | <b>47,781</b>  |
| <b>S11</b> | MH "Frail Elderly"                                                                                                                                                                                                                                                                                                                                                                                                                                                                                                                                                                                                                                                                                                                                                                                                                                                                                                                                                                                                                                                                                                                                                                                                                            | <b>6,390</b>   |
| <b>S10</b> | MH "Renal Insufficiency, Chronic+" OR MH "Kidney Failure, Chronic+" OR TI (esrd OR eskd OR ((renal* OR kidney*) N3 (insufficien* OR failur* OR disease*)) OR AB (esrd OR eskd OR ((renal* OR kidney*) N3 (insufficien* OR failur* OR disease*)) OR MH "Kidney Diseases+" OR MH "Diabetes Insipidus+" OR MH "Hypertension, Renal+" OR MH "Kidney Calculi+" OR MH "Kidney, Cystic+" OR MH "Kidney Neoplasms+" OR MH "Nephritis+" OR MH "Nephrosis+" OR MH "Renal Insufficiency+" OR MH "Renal Tubular Transport, Inborn Errors+" OR MH "Uremia+"                                                                                                                                                                                                                                                                                                                                                                                                                                                                                                                                                                                                                                                                                                | <b>83,508</b>  |
| <b>S9</b>  | MH "Intracranial Arteriosclerosis+" OR MH "Arteriosclerosis+" OR TI (atherosclero* OR arteriosclero*) OR AB (atherosclero* OR arteriosclero*)                                                                                                                                                                                                                                                                                                                                                                                                                                                                                                                                                                                                                                                                                                                                                                                                                                                                                                                                                                                                                                                                                                 | <b>39,353</b>  |
| <b>S8</b>  | MH "Heart Diseases+" OR MH "Arrhythmia+" OR MH "Heart Arrest+" OR MH "Endocarditis+" OR MH "Heart Defects, Congenital+" OR MH "Heart Failure+" OR MH "Heart Hypertrophy+" OR MH "Heart Neoplasms+" OR MH "Heart Valve Diseases+" OR MH "Myocardial Diseases+" OR MH "Myocardial Ischemia+" OR MH "Ventricular Dysfunction+" OR MH "Ventricular Outflow Obstruction+" OR MH "Vascular Diseases+" OR MH "Cardiovascular Abnormalities+" OR MH "Neovascularization, Physiologic" OR MH "Collateral Circulation" OR TI (cardiovascul* OR heart OR vascular* OR cardiac OR myocard* OR coronary OR coronaries OR (collateral N3 circulation) OR "angina pectoris") OR AB (cardiovascul* OR heart OR vascular* OR cardiac OR myocard* OR coronary OR coronaries OR (collateral N3 circulation) OR "angina pectoris")                                                                                                                                                                                                                                                                                                                                                                                                                                | <b>638,165</b> |
| <b>S7</b>  | MH "Pulmonary Disease, Chronic Obstructive+" OR "Chronic Obstructive Pulmonary Disease*" OR TI (copd* OR "chronic bronchiti*" OR emphysema*) OR AB (copd* OR "chronic bronchiti*" OR emphysema*)                                                                                                                                                                                                                                                                                                                                                                                                                                                                                                                                                                                                                                                                                                                                                                                                                                                                                                                                                                                                                                              | <b>24,860</b>  |
| <b>S6</b>  | MH "Parkinsonian Disorders" OR MH "Parkinson Disease" OR TI (parkinson*) OR AB (parkinson*)                                                                                                                                                                                                                                                                                                                                                                                                                                                                                                                                                                                                                                                                                                                                                                                                                                                                                                                                                                                                                                                                                                                                                   | <b>24,343</b>  |

|           |                                                                                                                                                                                                                                                                                                                                                                                                                                                                                                                                                                                                                                                                                                                                                                                                                                                                                                                                                                                                                                                                                                                                                                                                                                                                                                                                                                                                                                                                                                                                                 |                |
|-----------|-------------------------------------------------------------------------------------------------------------------------------------------------------------------------------------------------------------------------------------------------------------------------------------------------------------------------------------------------------------------------------------------------------------------------------------------------------------------------------------------------------------------------------------------------------------------------------------------------------------------------------------------------------------------------------------------------------------------------------------------------------------------------------------------------------------------------------------------------------------------------------------------------------------------------------------------------------------------------------------------------------------------------------------------------------------------------------------------------------------------------------------------------------------------------------------------------------------------------------------------------------------------------------------------------------------------------------------------------------------------------------------------------------------------------------------------------------------------------------------------------------------------------------------------------|----------------|
| <b>S5</b> | MH "Stroke" OR MH "Stroke Patients" OR TI (cva OR cvas OR stroke OR "cerebrovascular accident*" OR apoplex* OR "brain vascular accident" OR "brain vascular accidents") OR AB (cva OR cvas OR stroke OR "cerebrovascular accident*" OR apoplex* OR "brain vascular accident" OR "brain vascular accidents")                                                                                                                                                                                                                                                                                                                                                                                                                                                                                                                                                                                                                                                                                                                                                                                                                                                                                                                                                                                                                                                                                                                                                                                                                                     | <b>90,438</b>  |
| <b>S4</b> | MH "Neoplasms+" OR TI (adenoma* OR anticarcinogen* OR blastoma* OR cancer* OR carcinogen* OR carcinom* OR carcinosarcoma* OR chordoma* OR germinoma* OR gonadoblastoma* OR hepatoblastoma* OR hodgkin n3 disease OR leukemia* OR lymphangioma* OR lymphangiomyoma* OR lymphangiosarcoma* OR lymphom* OR malignan* OR melanom* OR meningioma* OR mesenchymoma* OR mesonephroma* OR metasta* OR neoplas* OR neuroma* OR nsclc OR oncogen* OR oncolog* OR paraneoplastic OR plasmacytoma* OR precancerous OR sarcoma* OR teratocarcinoma* OR teratoma* OR tumor* OR tumour*) OR AB (adenoma* OR anticarcinogen* OR blastoma* OR cancer* OR carcinogen* OR carcinom* OR carcinosarcoma* OR chordoma* OR germinoma* OR gonadoblastoma* OR hepatoblastoma* OR hodgkin n3 disease OR leukemia* OR lymphangioma* OR lymphangiomyoma* OR lymphangiosarcoma* OR lymphom* OR malignan* OR melanom* OR meningioma* OR mesenchymoma* OR mesonephroma* OR metasta* OR neoplas* OR neuroma* OR nsclc OR oncogen* OR oncolog* OR paraneoplastic OR plasmacytoma* OR precancerous OR sarcoma* OR teratocarcinoma* OR teratoma* OR tumor* OR tumour*)                                                                                                                                                                                                                                                                                                                                                                                                             | <b>610,609</b> |
| <b>S3</b> | MH "Hospice and Palliative Nursing" OR MH "Palliative Care" OR MH "Terminal Care" OR MH "Hospice Care" OR MH "Terminal Care (Saba CCC)" OR MH "Hospices" OR TI (palliati* OR terminal* OR "end of life" OR "limited life" OR dying* OR "life threaten*" OR "life end" OR "life ending" OR "life ended" OR "life ends" OR "last stage of life" OR incurabl* OR hospice*) OR AB (palliati* OR terminal* OR "end of life" OR "limited life" OR dying* OR "life threaten*" OR "life end" OR "life ending" OR "life ended" OR "life ends" OR "last stage of life" OR incurabl* OR hospice*)                                                                                                                                                                                                                                                                                                                                                                                                                                                                                                                                                                                                                                                                                                                                                                                                                                                                                                                                                          | <b>101,424</b> |
| <b>S2</b> | MH "Health Personnel+" OR MH "Allied Health Personnel+" OR MH "Medical Staff+" OR MH "Medical Staff, Hospital+" OR MH "Mental Health Personnel+" OR MH "Novice Clinicians+" OR MH "Nurses by Educational Level+" OR MH "Nurses+" OR MH "Nurses by Role+" OR MH "Nurse Practitioners+" OR MH "Advanced Practice Nurses+" OR MH "Nurse Administrators+" OR MH "Nurse Consultants+" OR MH "Pediatric Nurse Practitioners+" OR MH "Nurses by Specialty+" OR MH "Nurses, Other+" OR MH "Personnel, Health Facility+" OR MH "Physicians+" OR MH "Registry Personnel+" OR TI ("health care worker*" OR "health care professional*" OR "health care staff" OR physician* OR "medical speciali*" OR doctor* OR nurse OR nurses OR nursing* OR surgeon* OR oncologist* OR geriatrist* OR internist* OR gynaecologist* OR gynecologist* OR obstetrician* OR intensivist* OR neurologist* OR paediatrician* OR pediatrician* OR cardiologist* OR pulmonologist* OR orthopaedic* OR orthopedic* OR urologist* OR resident* OR "medical student*" OR residency OR residencies OR intern OR interns OR internship* OR "house staff*" OR psychologist* OR psychiatrist*) OR AB ("health care worker*" OR "health care professional*" OR "health care staff" OR physician* OR "medical speciali*" OR doctor* OR nurse OR nurses OR nursing* OR surgeon* OR oncologist* OR geriatrist* OR internist* OR gynaecologist* OR gynecologist* OR obstetrician* OR intensivist* OR neurologist* OR paediatrician* OR pediatrician* OR cardiologist* OR pulmonologist* OR | <b>997,791</b> |

|           |                                                                                                                                                                                                                                                                                                                                                                                                                                                                                                                                                                                       |                |
|-----------|---------------------------------------------------------------------------------------------------------------------------------------------------------------------------------------------------------------------------------------------------------------------------------------------------------------------------------------------------------------------------------------------------------------------------------------------------------------------------------------------------------------------------------------------------------------------------------------|----------------|
|           | orthopaedic* OR orthopedic* OR urologist* OR resident* OR "medical student*" OR residency OR residencies OR intern OR interns OR internship* OR "house staff*" OR psychologist* OR psychiatrist*)                                                                                                                                                                                                                                                                                                                                                                                     |                |
| <b>S1</b> | MH "Decision Making" OR MH "Decision Making, Clinical" OR MH "Decision Support Techniques" OR MH "Decision Making, Patient" OR MH "Decision Making, Family" OR TI ("decision making" OR "decision aid*" OR "choice behavior*" OR "choice behaviour*" OR "decisionmaking*" OR "shared decision*" OR "medical decision*" OR "treatment decision*" OR "clinical decision*") OR AB ("decision making" OR "decision aid*" OR "choice behavior*" OR "choice behaviour*" OR "decisionmaking*" OR "shared decision*" OR "medical decision*" OR "treatment decision*" OR "clinical decision*") | <b>118,346</b> |

### Search strategy for Ebsco/PsycInfo (11 December 2018)

| Search     | Query                                                                                                                                                                                                                                                                                                                                                                                                                                                                                                                                                                                                                                                                                                                                                                                                                                                                                                                                                                                                                                                                                                          | Items found    |
|------------|----------------------------------------------------------------------------------------------------------------------------------------------------------------------------------------------------------------------------------------------------------------------------------------------------------------------------------------------------------------------------------------------------------------------------------------------------------------------------------------------------------------------------------------------------------------------------------------------------------------------------------------------------------------------------------------------------------------------------------------------------------------------------------------------------------------------------------------------------------------------------------------------------------------------------------------------------------------------------------------------------------------------------------------------------------------------------------------------------------------|----------------|
| <b>S16</b> | S15 NOT ((ZG ("adolescence (13-17 yrs)" OR "childhood (birth-12 yrs)" OR "infancy (2-23 mo)" OR "neonatal (birth-1 mo)" OR "preschool age (2-5 yrs)" OR "school age (6-12 yrs)") OR TI (adolescen* OR child* OR schoolchild* OR infant* OR girl* OR boy* OR teen OR teens OR teenager* OR youth* OR pediater* OR paediatr* OR puber*) OR AB (adolescen* OR child* OR schoolchild* OR infant* OR girl* OR boy* OR teen OR teens OR teenager* OR youth* OR pediater* OR paediatr* OR puber*)) NOT (ZG ("adulthood (18 yrs & older)" OR "aged (65 yrs & older)" OR "middle age (40-64 yrs)" OR "thirties (30-39 yrs)" OR "very old (85 yrs & older)") OR TI (adult* OR man OR men OR woman OR women) OR AB (adult* OR man OR men OR woman OR women)))                                                                                                                                                                                                                                                                                                                                                             | <b>758</b>     |
| <b>S15</b> | S1 AND S2 AND S3 AND S14                                                                                                                                                                                                                                                                                                                                                                                                                                                                                                                                                                                                                                                                                                                                                                                                                                                                                                                                                                                                                                                                                       | <b>787</b>     |
| <b>S14</b> | S4 OR S5 OR S6 OR S7 OR S8 OR S9 OR S10 OR S11 OR S12 OR S13                                                                                                                                                                                                                                                                                                                                                                                                                                                                                                                                                                                                                                                                                                                                                                                                                                                                                                                                                                                                                                                   | <b>267,019</b> |
| <b>S13</b> | DE "Life Sustaining Treatment" OR DE "CPR" OR TI ("life support*" OR resuscitat* OR "nutritional support*" OR ((parenteral* OR enteral* OR artificial* OR force* OR tube OR tubes OR intravenous*) AND (feeding* OR nutrition*))) OR AB ("life support*" OR resuscitat* OR "nutritional support*" OR ((parenteral* OR enteral* OR artificial* OR force* OR tube OR tubes OR intravenous*) AND (feeding* OR nutrition*)))                                                                                                                                                                                                                                                                                                                                                                                                                                                                                                                                                                                                                                                                                       | <b>5,591</b>   |
| <b>S12</b> | ((DE "Health Impairments" OR DE "Comorbidity" OR TI (frail* OR vulnerab* OR multimorbid* OR comorb*) OR AB (frail* OR vulnerab* OR multimorbid* OR comorb*)) AND (DE "Elder Care" OR DE "Gerontology" OR DE "Geriatric Psychiatry" OR DE "Geriatric Patients" OR DE "Geriatrics" OR TI (elder* OR eldest OR frail* OR geriatr* OR "old age*" OR "oldest old*" OR senior* OR senium OR "very old*" OR septuagenarian* OR octagenarian* OR octogenarian* OR nonagenarian* OR centarian* OR centenarian* OR supercentenarian* OR "older people" OR "older subject*" OR "older patient*" OR "older age*" OR "older adult*" OR "older man" OR "older men" OR "older male*" OR "older woman" OR "older women" OR "older female*" OR "older population*" OR "older person*") OR AB (elder* OR eldest OR frail* OR geriatr* OR "old age*" OR "oldest old*" OR senior* OR senium OR "very old*" OR septuagenarian* OR octagenarian* OR octogenarian* OR nonagenarian* OR centarian* OR centenarian* OR supercentenarian* OR "older people" OR "older subject*" OR "older patient*" OR "older age*" OR "older adult*" OR | <b>14,447</b>  |

|            |                                                                                                                                                                                                                                                                                                                                                                                                                                                                                                                                                                                                                                                                                                                                                                                                                                                                                                                                                                                                                                                                                                                                                                                                                                                                                                 |                |
|------------|-------------------------------------------------------------------------------------------------------------------------------------------------------------------------------------------------------------------------------------------------------------------------------------------------------------------------------------------------------------------------------------------------------------------------------------------------------------------------------------------------------------------------------------------------------------------------------------------------------------------------------------------------------------------------------------------------------------------------------------------------------------------------------------------------------------------------------------------------------------------------------------------------------------------------------------------------------------------------------------------------------------------------------------------------------------------------------------------------------------------------------------------------------------------------------------------------------------------------------------------------------------------------------------------------|----------------|
|            | "older man" OR "older men" OR "older male*" OR "older woman" OR "older women" OR "older female*" OR "older population*" OR "older person*"))                                                                                                                                                                                                                                                                                                                                                                                                                                                                                                                                                                                                                                                                                                                                                                                                                                                                                                                                                                                                                                                                                                                                                    |                |
| <b>S11</b> | TI ("serious illness*") OR AB ("serious illness*")                                                                                                                                                                                                                                                                                                                                                                                                                                                                                                                                                                                                                                                                                                                                                                                                                                                                                                                                                                                                                                                                                                                                                                                                                                              | <b>1,451</b>   |
| <b>S10</b> | DE "Kidney Diseases" OR TI (esrd OR eskd OR ((renal* OR kidney*) N3 (insufficien* OR failur* OR disease*)) OR AB (esrd OR eskd OR ((renal* OR kidney*) N3 (insufficien* OR failur* OR disease*)))                                                                                                                                                                                                                                                                                                                                                                                                                                                                                                                                                                                                                                                                                                                                                                                                                                                                                                                                                                                                                                                                                               | <b>4,975</b>   |
| <b>S9</b>  | DE "Arteriosclerosis" OR DE "Atherosclerosis" OR DE "Cerebral Arteriosclerosis" OR TI (atherosclero* OR arteriosclero*) OR AB (atherosclero* OR arteriosclero*)                                                                                                                                                                                                                                                                                                                                                                                                                                                                                                                                                                                                                                                                                                                                                                                                                                                                                                                                                                                                                                                                                                                                 | <b>3,521</b>   |
| <b>S8</b>  | DE "Aneurysms" OR DE "Angina Pectoris" OR DE "Arrhythmias (Heart)" OR DE "Blood Pressure Disorders" OR DE "Cardiovascular Disorders" OR DE "Cerebral Arteriosclerosis" OR DE "Cerebral Hemorrhage" OR DE "Cerebral Ischemia" OR DE "Cerebral Small Vessel Disease" OR DE "Cerebrovascular Disorders" OR DE "Coronary Thromboses" OR DE "Embolisms" OR DE "Essential Hypertension" OR DE "Heart Disorders" OR DE "Hematoma" OR DE "Hemorrhage" OR DE "Hypertension" OR DE "Hypotension" OR DE "Ischemia" OR DE "Myocardial Infarctions" OR DE "Subarachnoid Hemorrhage" OR DE "Syncope" OR DE "Thromboses" OR TI (cardiovascul* OR heart OR vascular* OR cardiac OR myocard* OR coronary OR coronaries OR (collateral N3 circulation) OR "angina pectoris") OR AB (cardiovascul* OR heart OR vascular* OR cardiac OR myocard* OR coronary OR coronaries OR (collateral N3 circulation) OR "angina pectoris")                                                                                                                                                                                                                                                                                                                                                                                     | <b>121,344</b> |
| <b>S7</b>  | DE "Chronic Obstructive Pulmonary Disease" OR DE "Bronchial Disorders" OR DE "Pulmonary Emphysema" OR TI (copd* OR "chronic bronchiti*" OR emphysema*) OR AB (copd* OR "chronic bronchiti*" OR emphysema*)                                                                                                                                                                                                                                                                                                                                                                                                                                                                                                                                                                                                                                                                                                                                                                                                                                                                                                                                                                                                                                                                                      | <b>2,086</b>   |
| <b>S6</b>  | DE "Parkinson's Disease" OR TI (parkinson*) OR AB (parkinson*)                                                                                                                                                                                                                                                                                                                                                                                                                                                                                                                                                                                                                                                                                                                                                                                                                                                                                                                                                                                                                                                                                                                                                                                                                                  | <b>31,604</b>  |
| <b>S5</b>  | DE "Cerebrovascular Accidents" OR TI (cva OR cvas OR stroke OR "cerebrovascular accident*" OR apoplex* OR "brain vascular accident" OR "brain vascular accidents") OR AB (cva OR cvas OR stroke OR "cerebrovascular accident*" OR apoplex* OR "brain vascular accident" OR "brain vascular accidents")                                                                                                                                                                                                                                                                                                                                                                                                                                                                                                                                                                                                                                                                                                                                                                                                                                                                                                                                                                                          | <b>33,769</b>  |
| <b>S4</b>  | DE "Neoplasms" OR DE "Benign Neoplasms" OR DE "Breast Neoplasms" OR DE "Endocrine Neoplasms" OR DE "Leukemias" OR DE "Nervous System Neoplasms" OR DE "Terminal Cancer" OR TI (adenoma* OR anticarcinogen* OR blastoma* OR cancer* OR carcinogen* OR carcinom* OR carcinosarcoma* OR chordoma* OR germinoma* OR gonadoblastoma* OR hepatoblastoma* OR (hodgkin N3 disease) OR leukemia* OR lymphangioma* OR lymphangiomyoma* OR lymphangiosarcoma* OR lymphom* OR malignan* OR melanom* OR meningioma* OR mesenchymoma* OR mesonephroma* OR metasta* OR neoplas* OR neuroma* OR nsclc OR oncogen* OR oncolog* OR paraneoplastic OR plasmacytoma* OR precancerous OR sarcoma* OR teratocarcinoma* OR teratoma* OR tumor* OR tumour*) OR AB (adenoma* OR anticarcinogen* OR blastoma* OR cancer* OR carcinogen* OR carcinom* OR carcinosarcoma* OR chordoma* OR germinoma* OR gonadoblastoma* OR hepatoblastoma* OR (hodgkin N3 disease) OR leukemia* OR lymphangioma* OR lymphangiomyoma* OR lymphangiosarcoma* OR lymphom* OR malignan* OR melanom* OR meningioma* OR mesenchymoma* OR mesonephroma* OR metasta* OR neoplas* OR neuroma* OR nsclc OR oncogen* OR oncolog* OR paraneoplastic OR plasmacytoma* OR precancerous OR sarcoma* OR teratocarcinoma* OR teratoma* OR tumor* OR tumour*) | <b>81,495</b>  |
| <b>S3</b>  | DE "Palliative Care" OR DE "Hospice" OR DE "Death and Dying" OR DE "Palliative Care" OR DE "Terminally Ill Patients" OR TI (palliati* OR terminal* OR "end of                                                                                                                                                                                                                                                                                                                                                                                                                                                                                                                                                                                                                                                                                                                                                                                                                                                                                                                                                                                                                                                                                                                                   | <b>74,850</b>  |



|           |                                                                                                                                                                                                                                                                                                                                                                                                                                                                                                                                                                                                                                                                                                                                                                                                                                                                                                                                                                                                                                                                                                                                                                                                                                                                                                                                                                                                                                                                                                                                                                                                                                                                                                                                                                                                                                                                                                                                                                                                                                       |                |
|-----------|---------------------------------------------------------------------------------------------------------------------------------------------------------------------------------------------------------------------------------------------------------------------------------------------------------------------------------------------------------------------------------------------------------------------------------------------------------------------------------------------------------------------------------------------------------------------------------------------------------------------------------------------------------------------------------------------------------------------------------------------------------------------------------------------------------------------------------------------------------------------------------------------------------------------------------------------------------------------------------------------------------------------------------------------------------------------------------------------------------------------------------------------------------------------------------------------------------------------------------------------------------------------------------------------------------------------------------------------------------------------------------------------------------------------------------------------------------------------------------------------------------------------------------------------------------------------------------------------------------------------------------------------------------------------------------------------------------------------------------------------------------------------------------------------------------------------------------------------------------------------------------------------------------------------------------------------------------------------------------------------------------------------------------------|----------------|
|           | life" OR "limited life" OR dying* OR "life threaten*" OR "life end" OR "life ending" OR "life ended" OR "life ends" OR "last stage of life" OR incurabl* OR hospice*) OR AB (palliati* OR terminal* OR "end of life" OR "limited life" OR dying* OR "life threaten*" OR "life end" OR "life ending" OR "life ended" OR "life ends" OR "last stage of life" OR incurabl* OR hospice*)                                                                                                                                                                                                                                                                                                                                                                                                                                                                                                                                                                                                                                                                                                                                                                                                                                                                                                                                                                                                                                                                                                                                                                                                                                                                                                                                                                                                                                                                                                                                                                                                                                                  |                |
| <b>S2</b> | DE "Allied Health Personnel" OR DE "Occupational Therapists" OR DE "Physical Therapists" OR DE "Psychiatric Aides" OR DE "Speech Therapists" OR DE "Medical Personnel" OR DE "Dentists" OR DE "Military Medical Personnel" OR DE "Nurses" OR DE "Optometrists" OR DE "Pharmacists" OR DE "Physical Therapists" OR DE "Physicians" OR DE "Psychiatric Hospital Staff" OR DE "Health Personnel" OR DE "Allied Health Personnel" OR DE "Mental Health Personnel" OR DE "Nurses" OR DE "Psychiatric Nurses" OR DE "Public Health Service Nurses" OR DE "Physicians" OR DE "Family Physicians" OR DE "General Practitioners" OR DE "Gynecologists" OR DE "Internists" OR DE "Neurologists" OR DE "Obstetricians" OR DE "Pathologists" OR DE "Pediatricians" OR DE "Psychiatrists" OR DE "Surgeons" OR DE "Psychiatric Hospital Staff" OR DE "Clinicians" OR TI ("health care worker*" OR "health care professional*" OR "health care staff" OR physician* OR "medical speciali*" OR doctor* OR nurse OR nurses OR nursing* OR surgeon* OR oncologist* OR geriatrist* OR internist* OR gynaecologist* OR gynecologist* OR obstetrician* OR intensivist* OR neurologist* OR paediatrician* OR pediatrician* OR cardiologist* OR pulmonologist* OR orthopaedic* OR orthopedic* OR urologist* OR resident* OR "medical student*" OR residency OR residencies OR intern OR interns OR internship* OR "house staff*" OR psychologist* OR psychiatrist*) OR AB ("health care worker*" OR "health care professional*" OR "health care staff" OR physician* OR "medical speciali*" OR doctor* OR nurse OR nurses OR nursing* OR surgeon* OR oncologist* OR geriatrist* OR internist* OR gynaecologist* OR gynecologist* OR obstetrician* OR intensivist* OR neurologist* OR paediatrician* OR pediatrician* OR cardiologist* OR pulmonologist* OR orthopaedic* OR orthopedic* OR urologist* OR resident* OR "medical student*" OR residency OR residencies OR intern OR interns OR internship* OR "house staff*" OR psychologist* OR psychiatrist*) | <b>393,715</b> |
| <b>S1</b> | DE "Decision Making" OR DE "Group Decision Making" OR DE "Decision Support Systems" OR TI ("decision making" OR "decision aid*" OR "choice behavior*" OR "choice behaviour*" OR "decisionmaking*" OR "shared decision*" OR "medical decision*" OR "treatment decision*" OR "clinical decision*") OR AB ("decision making" OR "decision aid*" OR "choice behavior*" OR "choice behaviour*" OR "decisionmaking*" OR "shared decision*" OR "medical decision*" OR "treatment decision*" OR "clinical decision*")                                                                                                                                                                                                                                                                                                                                                                                                                                                                                                                                                                                                                                                                                                                                                                                                                                                                                                                                                                                                                                                                                                                                                                                                                                                                                                                                                                                                                                                                                                                         | <b>121,226</b> |

#### Search strategy for Embase.com (10 January 2019)

| Search     | Query                                                                                                                                                                                                                                                                                                                                                                                                  | Items found  |
|------------|--------------------------------------------------------------------------------------------------------------------------------------------------------------------------------------------------------------------------------------------------------------------------------------------------------------------------------------------------------------------------------------------------------|--------------|
| <b>#21</b> | #20 NOT (('adolescent'/exp OR 'child'/exp OR adolescent*:ti,ab OR child*:ti,ab OR schoolchild*:ti,ab OR infant*:ti,ab OR girl*:ti,ab OR boy*:ti,ab OR teen:ti,ab OR teens:ti,ab OR teenager*:ti,ab OR youth*:ti,ab OR pediatr*:ti,ab OR paediatr*:ti,ab OR puber*:ti,ab) NOT ('adult'/exp OR 'aged'/exp OR 'middle aged'/exp OR adult*:ti,ab OR man:ti,ab OR men:ti,ab OR woman:ti,ab OR women:ti,ab)) | <b>4,565</b> |

|     |                                                                                                                                                                                                                                                                                                                                                                                                                                                                                                                                                                                                                                                                                                                                                                                                                                                                                                                  |            |
|-----|------------------------------------------------------------------------------------------------------------------------------------------------------------------------------------------------------------------------------------------------------------------------------------------------------------------------------------------------------------------------------------------------------------------------------------------------------------------------------------------------------------------------------------------------------------------------------------------------------------------------------------------------------------------------------------------------------------------------------------------------------------------------------------------------------------------------------------------------------------------------------------------------------------------|------------|
| #20 | #19 NOT ('conference abstract'/it OR 'conference paper'/it OR 'conference review'/it)                                                                                                                                                                                                                                                                                                                                                                                                                                                                                                                                                                                                                                                                                                                                                                                                                            | 4,921      |
| #19 | #1 AND #2 AND #3 AND #18                                                                                                                                                                                                                                                                                                                                                                                                                                                                                                                                                                                                                                                                                                                                                                                                                                                                                         | 7,292      |
| #18 | #4 OR #9 OR #10 OR #11 OR #12 OR #13 OR #14 OR #15 OR #16 OR #17                                                                                                                                                                                                                                                                                                                                                                                                                                                                                                                                                                                                                                                                                                                                                                                                                                                 | 11,122,167 |
| #17 | 'neoplasm'/exp OR adenoma*:ti,ab,kw OR anticarcinogen*:ti,ab,kw OR blastoma*:ti,ab,kw OR cancer*:ti,ab,kw OR carcinogen*:ti,ab,kw OR carcinom*:ti,ab,kw OR carcinosarcoma*:ti,ab,kw OR chordoma*:ti,ab,kw OR germinoma*:ti,ab,kw OR gonadoblastoma*:ti,ab,kw OR hepatoblastoma*:ti,ab,kw OR ((hodgkin* NEXT/1 disease):ti,ab,kw) OR leukemia*:ti,ab,kw OR lymphangioma*:ti,ab,kw OR lymphangiomyoma*:ti,ab,kw OR lymphangiosarcoma*:ti,ab,kw OR lymphom*:ti,ab,kw OR malignan*:ti,ab,kw OR melanom*:ti,ab,kw OR meningioma*:ti,ab,kw OR mesenchymoma*:ti,ab,kw OR mesonephroma*:ti,ab,kw OR metasta*:ti,ab,kw OR neoplas*:ti,ab,kw OR neuroma*:ti,ab,kw OR nsclc:ti,ab,kw OR oncogen*:ti,ab,kw OR oncolog*:ti,ab,kw OR paraneoplastic:ti,ab,kw OR plasmacytoma*:ti,ab,kw OR precancerous:ti,ab,kw OR sarcoma*:ti,ab,kw OR teratocarcinoma*:ti,ab,kw OR teratoma*:ti,ab,kw OR tumor*:ti,ab,kw OR tumour*:ti,ab,kw | 5,496,390  |
| #16 | 'cerebrovascular accident'/exp OR cva:ti,ab,kw OR cvas:ti,ab,kw OR stroke:ti,ab,kw OR apoplex*:ti,ab,kw OR poststroke*:ti,ab,kw OR ((brain*:ti,ab,kw OR cerebr*:ti,ab,kw OR cerebell*:ti,ab,kw OR intracran*:ti,ab,kw OR intracerebral*:ti,ab,kw OR vertebrobasilar*:ti,ab,kw) AND vascular*:ti,ab,kw AND (disease:ti,ab,kw OR diseases:ti,ab,kw OR accident*:ti,ab,kw OR disorder*:ti,ab,kw)) OR (cerebrovascular*:ti,ab,kw AND (disease:ti,ab,kw OR diseases:ti,ab,kw OR accident*:ti,ab,kw OR disorder*:ti,ab,kw)) OR ((brain*:ti,ab,kw OR cerebr*:ti,ab,kw OR cerebell*:ti,ab,kw OR intracran*:ti,ab,kw OR intracerebral*:ti,ab,kw OR vertebrobasilar*:ti,ab,kw) AND (haemorrhag*:ti,ab,kw OR hemorrhag*:ti,ab,kw OR ischemi*:ti,ab,kw OR ischaemi*:ti,ab,kw OR infarct*:ti,ab,kw OR haematoma*:ti,ab,kw OR hematoma*:ti,ab,kw OR bleed*:ti,ab,kw))                                                          | 645,471    |
| #15 | 'parkinson disease'/exp OR parkinson*:ti,ab,kw                                                                                                                                                                                                                                                                                                                                                                                                                                                                                                                                                                                                                                                                                                                                                                                                                                                                   | 182,517    |
| #14 | 'chronic obstructive lung disease'/exp OR 'chronic bronchitis'/exp OR 'lung emphysema'/exp OR copd*:ti,ab,kw OR 'chronic bronchiti*':ti,ab,kw OR emphysema*:ti,ab,kw                                                                                                                                                                                                                                                                                                                                                                                                                                                                                                                                                                                                                                                                                                                                             | 185,281    |
| #13 | 'aneurysm'/exp OR 'angina pectoris'/exp OR 'heart arrhythmia'/exp OR 'cardiovascular disease'/exp OR 'coronary artery thrombosis'/exp OR 'embolism'/exp OR 'arterial thromboembolism'/exp OR 'hematoma'/exp OR 'bleeding'/exp OR 'faintness'/exp OR cardiovascul*:ti,ab,kw OR heart:ti,ab,kw OR vascular*:ti,ab,kw OR cardiac:ti,ab,kw OR myocard*:ti,ab,kw OR coronary:ti,ab,kw OR coronaries:ti,ab,kw OR (collateral:ti,ab,kw AND circulation:ti,ab,kw) OR 'angina pectoris':ti,ab,kw                                                                                                                                                                                                                                                                                                                                                                                                                          | 5,535,270  |
| #12 | 'arteriosclerosis'/exp OR atherosclero*:ti,ab,kw OR arteriosclero*:ti,ab,kw                                                                                                                                                                                                                                                                                                                                                                                                                                                                                                                                                                                                                                                                                                                                                                                                                                      | 312,313    |
| #11 | 'kidney disease'/exp OR esrd:ti,ab,kw OR ((renal*:ti,ab,kw OR kidney*:ti,ab,kw) AND (insufficien*:ti,ab,kw OR failur*:ti,ab,kw OR disease*:ti,ab,kw)) OR eskd:ti,ab,kw                                                                                                                                                                                                                                                                                                                                                                                                                                                                                                                                                                                                                                                                                                                                           | 1,054,006  |
| #10 | 'serious illness*':ti,ab,kw                                                                                                                                                                                                                                                                                                                                                                                                                                                                                                                                                                                                                                                                                                                                                                                                                                                                                      | 4,486      |
| #9  | #5 OR #8                                                                                                                                                                                                                                                                                                                                                                                                                                                                                                                                                                                                                                                                                                                                                                                                                                                                                                         | 151,358    |
| #8  | #6 AND #7                                                                                                                                                                                                                                                                                                                                                                                                                                                                                                                                                                                                                                                                                                                                                                                                                                                                                                        | 148,763    |
| #7  | 'aged'/exp OR 'geriatric care'/exp OR 'geriatric patient'/exp OR 'geriatrics'/exp OR 'gerontology'/exp OR elder*:ti,ab,kw OR eldest:ti,ab,kw OR frail*:ti,ab,kw                                                                                                                                                                                                                                                                                                                                                                                                                                                                                                                                                                                                                                                                                                                                                  | 3,123,396  |



|    |                                                                                                                                                                                                                                                                                                                                                                                                                                                                                                                                                                                                                                                                                                                                                                                                                                                                                                                                       |           |
|----|---------------------------------------------------------------------------------------------------------------------------------------------------------------------------------------------------------------------------------------------------------------------------------------------------------------------------------------------------------------------------------------------------------------------------------------------------------------------------------------------------------------------------------------------------------------------------------------------------------------------------------------------------------------------------------------------------------------------------------------------------------------------------------------------------------------------------------------------------------------------------------------------------------------------------------------|-----------|
|    | OR geriatric*:ti,ab,kw OR 'old age*:ti,ab,kw OR 'oldest old*:ti,ab,kw OR senior*:ti,ab,kw OR senium:ti,ab,kw OR 'very old*:ti,ab,kw OR septuagenarian*:ti,ab,kw OR octagenarian*:ti,ab,kw OR octogenarian*:ti,ab,kw OR nonagenarian*:ti,ab,kw OR centarian*:ti,ab,kw OR centenarian*:ti,ab,kw OR supercentenarian*:ti,ab,kw OR 'older people':ti,ab,kw OR 'older subject*:ti,ab,kw OR 'older patient*:ti,ab,kw OR 'older age*:ti,ab,kw OR 'older adult*:ti,ab,kw OR 'older man':ti,ab,kw OR 'older men':ti,ab,kw OR 'older male*:ti,ab,kw OR 'older woman':ti,ab,kw OR 'older women':ti,ab,kw OR 'older female*:ti,ab,kw OR 'older population*:ti,ab,kw OR 'older person*:ti,ab,kw                                                                                                                                                                                                                                                    |           |
| #6 | 'comorbidity'/exp OR 'multiple chronic conditions'/exp OR frail*:ti,ab,kw OR vulnerab*:ti,ab,kw OR multimorbid*:ti,ab,kw OR comorb*:ti,ab,kw                                                                                                                                                                                                                                                                                                                                                                                                                                                                                                                                                                                                                                                                                                                                                                                          | 490,921   |
| #5 | 'frail elderly'/exp                                                                                                                                                                                                                                                                                                                                                                                                                                                                                                                                                                                                                                                                                                                                                                                                                                                                                                                   | 9,128     |
| #4 | 'life sustaining treatment'/exp OR 'resuscitation'/exp OR 'nutritional support'/exp OR 'life support*:ti,ab,kw OR resuscitat*:ti,ab,kw OR 'nutritional support*:ti,ab,kw OR ((parenteral*:ti,ab,kw OR enteral*:ti,ab,kw OR artificial*:ti,ab,kw OR force*:ti,ab,kw OR tube:ti,ab,kw OR tubes:ti,ab,kw OR intravenous*:ti,ab,kw) AND (feeding*:ti,ab,kw OR nutrition*:ti,ab,kw))                                                                                                                                                                                                                                                                                                                                                                                                                                                                                                                                                       | 236,238   |
| #3 | 'palliative therapy'/exp OR 'palliative nursing'/exp OR 'hospice'/exp OR 'death'/exp OR 'terminally ill patient'/exp OR 'end of life'/exp OR palliat*:ti,ab,kw OR terminal*:ti,ab,kw OR 'end of life':ti,ab,kw OR 'limited life':ti,ab,kw OR dying*:ti,ab,kw OR 'life threaten*:ti,ab,kw OR 'life end':ti,ab,kw OR 'life ending':ti,ab,kw OR 'life ended':ti,ab,kw OR 'life ends':ti,ab,kw OR 'last stage of life':ti,ab,kw OR incurabl*:ti,ab,kw OR hospice*:ti,ab,kw                                                                                                                                                                                                                                                                                                                                                                                                                                                                | 1,442,993 |
| #2 | 'health care personnel'/exp OR 'health care worker*:ti,ab,kw OR 'health care professional*:ti,ab,kw OR 'health care staff':ti,ab,kw OR physician*:ti,ab,kw OR 'medical speciali*:ti,ab,kw OR doctor*:ti,ab,kw OR nurse:ti,ab,kw OR nurses:ti,ab,kw OR nursing*:ti,ab,kw OR surgeon*:ti,ab,kw OR oncologist*:ti,ab,kw OR geriatrist*:ti,ab,kw OR internist*:ti,ab,kw OR gynaecologist*:ti,ab,kw OR gynecologist*:ti,ab,kw OR obstetrician*:ti,ab,kw OR intensivist*:ti,ab,kw OR neurologist*:ti,ab,kw OR paediatrician*:ti,ab,kw OR pediatrician*:ti,ab,kw OR cardiologist*:ti,ab,kw OR pulmonologist*:ti,ab,kw OR orthopaedic*:ti,ab,kw OR orthopedic*:ti,ab,kw OR urologist*:ti,ab,kw OR resident*:ti,ab,kw OR 'medical student*:ti,ab,kw OR residency:ti,ab,kw OR residencies:ti,ab,kw OR intern:ti,ab,kw OR interns:ti,ab,kw OR internship*:ti,ab,kw OR 'house staff*:ti,ab,kw OR psychologist*:ti,ab,kw OR psychiatrist*:ti,ab,kw | 2,510,548 |
| #1 | 'decision making'/de OR 'shared decision making'/exp OR 'patient decision making'/exp OR 'medical decision making'/exp OR 'family decision making'/exp OR 'clinical decision making'/exp OR 'decision making':ti,ab,kw OR 'decision aid*:ti,ab,kw OR 'choice behavior*:ti,ab,kw OR 'choice behaviour*:ti,ab,kw OR 'decisionmaking*:ti,ab,kw OR 'shared decision*:ti,ab,kw OR 'medical decision*:ti,ab,kw OR 'treatment decision*:ti,ab,kw OR 'clinical decision*:ti,ab,kw                                                                                                                                                                                                                                                                                                                                                                                                                                                             | 417,314   |

## Search strategy for Wiley/Cochrane Library (10 January 2019)

| Search | Query | Items found |
|--------|-------|-------------|
|--------|-------|-------------|

|     |                                                                                                                                                                                                                                                                                                                                                                                                                                                                                                                                                                                                                                     |         |
|-----|-------------------------------------------------------------------------------------------------------------------------------------------------------------------------------------------------------------------------------------------------------------------------------------------------------------------------------------------------------------------------------------------------------------------------------------------------------------------------------------------------------------------------------------------------------------------------------------------------------------------------------------|---------|
| #1  | ((decision NEXT making) OR (decision NEXT aid*) OR (choice NEXT behavior*) OR (choice NEXT behaviour*) OR decisionmaking* OR (shared NEXT decision*) OR (medical NEXT decision*) OR (treatment NEXT decision*) OR (clinical NEXT decision*)):ti,ab,kw                                                                                                                                                                                                                                                                                                                                                                               | 12,817  |
| #2  | ((health NEXT care NEXT worker*) OR (health NEXT care NEXT professional*) OR (health NEXT care NEXT staff) OR physician* OR (medical NEXT speciali*) OR doctor* OR nurse OR nurses OR nursing* OR surgeon* OR oncologist* OR geriatrist* OR internist* OR gynaecologist* OR gynecologist* OR obstetrician* OR intensivist* OR neurologist* OR paediatrician* OR pediatrician* OR cardiologist* OR pulmonologist* OR orthopaedic* OR orthopedic* OR urologist* OR resident* OR "medical student*" OR residency OR residencies OR intern OR interns OR internship* OR (house NEXT staff*) OR psychologist* OR psychiatrist*):ti,ab,kw | 94,469  |
| #3  | (palliati* OR terminal* OR (end NEAR/2 life) OR (limited NEXT life) OR dying* OR (life NEXT threaten*) OR (life NEXT end*) OR (last NEXT stage NEXT life) OR incurabl* OR hospice*):ti,ab,kw                                                                                                                                                                                                                                                                                                                                                                                                                                        | 18,235  |
| #4  | #1 AND #2 AND #3                                                                                                                                                                                                                                                                                                                                                                                                                                                                                                                                                                                                                    | 283     |
| #5  | (parenteral* OR enteral* OR artificial* OR force* OR tube OR tubes OR intravenous*) NEAR/3 (feeding* OR nutrition*)                                                                                                                                                                                                                                                                                                                                                                                                                                                                                                                 | 8,075   |
| #6  | (life NEXT support*) OR resuscitat* OR (nutritional NEXT support*)                                                                                                                                                                                                                                                                                                                                                                                                                                                                                                                                                                  | 8,882   |
| #7  | ((frail* OR vulnerab* OR multimorbid* OR comorb*) NEAR/3 (elder* OR eldest OR frail* OR geriatr* OR (old NEXT age*) OR (oldest NEXT old*) OR senior* OR senium OR (very NEXT old*) OR septuagenarian* OR octagenarian* OR octogenarian* OR nonagenarian* OR centarian* OR centenarian* OR supercentenarian* OR (older NEXT people) OR (older NEXT subject*) OR (older NEXT patient*) OR (older NEXT age*) OR (older NEXT adult*) OR (older NEXT man) OR (older NEXT men) OR (older NEXT male*) OR (older NEXT woman) OR (older NEXT women) OR (older NEXT female*) OR (older NEXT population*) OR (older NEXT person*)):ti,ab,kw    | 2,742   |
| #8  | (serious NEXT illness*):ti,ab,kw                                                                                                                                                                                                                                                                                                                                                                                                                                                                                                                                                                                                    | 271     |
| #9  | (esrd OR eskd OR ((renal* OR kidney*) NEAR/3 (insufficien* OR failur* OR disease*)) OR eskd):ti,ab,kw                                                                                                                                                                                                                                                                                                                                                                                                                                                                                                                               | 22,740  |
| #10 | (atherosclero* OR arteriosclero*):ti,ab,kw                                                                                                                                                                                                                                                                                                                                                                                                                                                                                                                                                                                          | 9,865   |
| #11 | (cardiovascul* OR heart OR vascular* OR cardiac OR myocard* OR coronary OR coronaries OR (collateral NEAR/3 circulation) OR (angina NEXT pectoris)):ti,ab,kw                                                                                                                                                                                                                                                                                                                                                                                                                                                                        | 190,473 |
| #12 | (copd* OR (chronic NEXT bronchiti*) OR emphysema*):ti,ab,kw                                                                                                                                                                                                                                                                                                                                                                                                                                                                                                                                                                         | 14,142  |
| #13 | parkinson*:ti,ab,kw                                                                                                                                                                                                                                                                                                                                                                                                                                                                                                                                                                                                                 | 7,815   |
| #14 | (cva OR cvas OR stroke OR apoplex* OR poststroke* OR ((brain* OR cerebr* OR cerebell* OR intracran* OR intracerebral* OR vertebrobasilar*) NEAR/3 vascular* NEAR/3 (disease OR diseases OR accident* OR disorder*)) OR (cerebrovascular* NEAR/3 (disease OR diseases OR accident* OR disorder*)) OR ((brain* OR cerebr* OR cerebell* OR intracran* OR intracerebral* OR vertebrobasilar*) NEAR/3 (haemorrhag* OR hemorrhag* OR ischemi* OR ischaemi* OR infarct* OR haematoma* OR hematoma* OR bleed*)):ti,ab,kw                                                                                                                    | 51,763  |
| #15 | (adenoma* OR anticarcinogen* OR blastoma* OR cancer* OR carcinogen* OR carcinom* OR carcinosarcoma* OR chordoma* OR germinoma* OR gonadoblastoma* OR hepatoblastoma* OR (hodgkin* NEXT/1 disease) OR leukemi* OR lymphangioma* OR lymphangiomyoma* OR lymphangiosarcoma* OR lymphom* OR malignan* OR melanom* OR meningioma* OR mesenchymoma* OR mesonephroma* OR metasta* OR neoplas* OR neuroma* OR nsclc OR oncogen* OR oncolog* OR paraneoplastic OR plasmacytoma* OR precancerous OR sarcoma* OR teratocarcinoma* OR teratoma* OR tumor* OR tumour*):ti,ab,kw                                                                  | 169,993 |
| #16 | #5 OR #6 OR #7 OR #8 OR #9 OR #10 OR #11 OR #12 OR #13 OR #14 OR #15                                                                                                                                                                                                                                                                                                                                                                                                                                                                                                                                                                | 421,268 |

|            |                   |            |
|------------|-------------------|------------|
| <b>#17</b> | <b>#4 AND #16</b> | <b>185</b> |
|------------|-------------------|------------|

*References per database: CDSR 5; CENTRAL 179, Editorial 1.*
