# Supplementary material for: Feasibility and effectiveness of tools that support communication and decision making in life-prolonging treatments for patients in hospital: a systematic review
Source: PubMed Central journal article supplement — BMJ Support Palliat Care. 2020 Oct 5;12(3):262–9. doi: 10.1136/bmjspcare-2020-002284 (PMC9411882; doi:10.1136/bmjspcare-2020-002284), 2020-10-05
Supplement: bmjspcare-2020-002284supp003.pdf [file bmjspcare-2020-002284supp003.pdf]

**Supplemental material 3: Scored quality assessments Mixed Methods Appraisal Tool (MMAT), version 2018 (1)**

Supplementary material to manuscript *Feasibility and effectiveness of tools that support communication and decision making in life-prolonging treatments for patients in hospital: a systematic review*

Authors: Maureen Thodé MSc, H. Roeline W. Pasman PhD, Liesbeth M. van Vliet PhD, Olga C. Damman PhD, Johannes C.F. Ket, Anneke L. Francke PhD, Irene P. Jongerden PhD

| First author<br>Year      | Category of<br>study design           | Methodological quality criteria                                                                    | Responses |          |            |
|---------------------------|---------------------------------------|----------------------------------------------------------------------------------------------------|-----------|----------|------------|
|                           |                                       |                                                                                                    | Yes       | No       | Can't tell |
| Leigh 2011                | 2. Randomized<br>controlled trials    | S1: Are there clear research questions?                                                            | X         |          |            |
|                           |                                       | S2: Do the collected data allow to address the research question?                                  | X         |          |            |
|                           |                                       | 2.1. Is randomization appropriately performed?                                                     | 1         |          |            |
|                           |                                       | 2.2. Are the groups comparable at baseline?                                                        | 1         |          |            |
|                           |                                       | 2.3. Are there complete outcome data?                                                              | 1         |          |            |
|                           |                                       | 2.4. Are outcome assessors blinded to the intervention provided?                                   |           | 1        |            |
|                           |                                       | 2.5 Did the participants adhere to the assigned intervention?                                      |           | 1        |            |
| <b>Total items scored</b> |                                       |                                                                                                    | <b>3</b>  | <b>2</b> | <b>0</b>   |
| Hollen 2013               | 4. Quantitative                       | S1: Are there clear research questions?                                                            | X         |          |            |
|                           |                                       | S2: Do the collected data allow to address the research question?                                  | X         |          |            |
|                           |                                       | 4.1 Is the sampling strategy relevant to address the research question?                            |           | 1        |            |
|                           |                                       | 4.2 Is the sample representative of the target population?                                         |           | 1        |            |
|                           |                                       | 4.3 Are the measurements appropriate?                                                              | 1         |          |            |
|                           |                                       | 4.4 Is the risk of nonresponse bias low?                                                           | 1         |          |            |
|                           |                                       | 4.5 Is the statistical analysis appropriate to answer the research question?                       |           | 1        |            |
| <b>Total items scored</b> |                                       |                                                                                                    | <b>2</b>  | <b>3</b> | <b>0</b>   |
| Walczak 2013              | 1. Qualitative                        | S1: Are there clear research questions?                                                            | X         |          |            |
|                           |                                       | S2: Do the collected data allow to address the research question?                                  | X         |          |            |
|                           |                                       | 1.1. Is the qualitative approach appropriate to answer the research question?                      | 1         |          |            |
|                           |                                       | 1.2. Are the qualitative data collection methods adequate to address the research question?        | 1         |          |            |
|                           |                                       | 1.3. Are the findings adequately derived from the data?                                            | 1         |          |            |
|                           |                                       | 1.4. Is the interpretation of results sufficiently substantiated by data?                          |           | 1        |            |
|                           |                                       | 1.5. Is there coherence between qualitative data sources, collection, analysis and interpretation? | 1         |          |            |
| <b>Total items scored</b> |                                       |                                                                                                    | <b>4</b>  | <b>1</b> | <b>0</b>   |
| Yeh 2014                  | 3. Quantitative<br>non-<br>randomized | S1: Are there clear research questions?                                                            | X         |          |            |
|                           |                                       | S2: Do the collected data allow to address the research question?                                  | X         |          |            |
|                           |                                       | 3.1. Are the participants representative of the target population?                                 |           | 1        |            |

|                 |                                 |                                                                                                                         |          |          |          |
|-----------------|---------------------------------|-------------------------------------------------------------------------------------------------------------------------|----------|----------|----------|
|                 |                                 | 3.2. Are measurements appropriate regarding both the outcome and intervention (or exposure)?                            | 1        |          |          |
|                 |                                 | 3.3. Are there complete outcome data?                                                                                   | 1        |          |          |
|                 |                                 | 3.4. Are the confounders accounted for in the design and analysis?                                                      |          | 1        |          |
|                 |                                 | 3.5. During the study period, is the intervention administered (or exposure occurred) as intended?                      | 1        |          |          |
|                 |                                 | <b>Total items scored</b>                                                                                               | <b>3</b> | <b>2</b> | <b>0</b> |
| Walczak 2014    | 1. Qualitative                  | S1: Are there clear research questions?                                                                                 | X        |          |          |
|                 |                                 | S2: Do the collected data allow to address the research question?                                                       | X        |          |          |
|                 |                                 | 1.1. Is the qualitative approach appropriate to answer the research question?                                           | 1        |          |          |
|                 |                                 | 1.2. Are the qualitative data collection methods adequate to address the research question?                             | 1        |          |          |
|                 |                                 | 1.3. Are the findings adequately derived from the data?                                                                 | 1        |          |          |
|                 |                                 | 1.4. Is the interpretation of results sufficiently substantiated by data?                                               | 1        |          |          |
|                 |                                 | 1.5. Is there coherence between qualitative data sources, collection, analysis and interpretation?                      |          | 1        |          |
|                 |                                 | <b>Total items scored</b>                                                                                               | <b>4</b> | <b>1</b> | <b>0</b> |
| Walczak 2017    | 2. Randomized controlled trials | S1: Are there clear research questions?                                                                                 | X        |          |          |
|                 |                                 | S2: Do the collected data allow to address the research question?                                                       | X        |          |          |
|                 |                                 | 2.1. Is randomization appropriately performed?                                                                          | 1        |          |          |
|                 |                                 | 2.2. Are the groups comparable at baseline?                                                                             | 1        |          |          |
|                 |                                 | 2.3. Are there complete outcome data?                                                                                   | 1        |          |          |
|                 |                                 | 2.4. Are outcome assessors blinded to the intervention provided?                                                        |          | 1        |          |
|                 |                                 | 2.5. Did the participants adhere to the assigned intervention?                                                          |          | 1        |          |
|                 |                                 | <b>Total items scored</b>                                                                                               | <b>3</b> | <b>2</b> | <b>0</b> |
| Henselmans 2018 | 5. Mixed methods                | S1: Are there clear research questions?                                                                                 | X        |          |          |
|                 |                                 | S2: Do the collected data allow to address the research question?                                                       | X        |          |          |
|                 |                                 | 5.1. Is there an adequate rationale for using a mixed methods design to address the research question?                  |          | 1        |          |
|                 |                                 | 5.2. Are the different components of the study effectively integrated to answer the research question?                  |          | 1        |          |
|                 |                                 | 5.3. Are the outputs of the integration of qualitative and quantitative components adequately interpreted?              | 1        |          |          |
|                 |                                 | 5.4. Are divergences and inconsistencies between quantitative and qualitative results adequately addressed?             | 1        |          |          |
|                 |                                 | 5.5. Do the different components of the study adhere to the quality criteria of each tradition of the methods involved? |          | 1        |          |
|                 |                                 | <b>Total items scored</b>                                                                                               | <b>2</b> | <b>3</b> | <b>0</b> |

Abbreviation: S1=screening question 1, S2=screening question 2

- Hong QN PP, Fàbregues S, Bartlett G, Boardman F, Cargo M, Dagenais P, Gagnon, M-P GF, Nicolau B, O’Cathain A, Rousseau M-C, Vedel I. Mixed Methods Appraisal Tool (MMAT), version 2018. Registration of Copyright (#1148552), Canadian Intellectual Property Office, Industry Canada. .
