# Supplementary material for: Feasibility and effectiveness of tools that support communication and decision making in life-prolonging treatments for patients in hospital: a systematic review
Source: PubMed Central journal article supplement — BMJ Support Palliat Care. 2020 Oct 5;12(3):262–9. doi: 10.1136/bmjspcare-2020-002284 (PMC9411882; doi:10.1136/bmjspcare-2020-002284), 2020-10-05
Supplement: bmjspcare-2020-002284supp004.pdf [file bmjspcare-2020-002284supp004.pdf]

**Supplemental material 4**

Supplementary material to manuscript *Feasibility and effectiveness of tools that support communication and decision making in life-prolonging treatments for patients in hospital: a systematic review*

Authors: Maureen Thodé, H. Roeline W. Pasman, Liesbeth M. van Vliet, Olga C. Damman, Johannes C.F. Ket, Anneke L. Francke, Irene P. Jongerden

**Table 2.** Characteristics and outcomes of evaluated tools for supporting treatment decisions

| First author (Year) | Tool for supporting treatment decision | Tool description                                                 | Treatment decision                                                      | Effectiveness of tool                                                                                                                                                                                                                                                                                                                                                                                                                                                                                                                                                                                                                                                                                                                                                                                                        | Feasibility of tool | MMAT* |
|---------------------|----------------------------------------|------------------------------------------------------------------|-------------------------------------------------------------------------|------------------------------------------------------------------------------------------------------------------------------------------------------------------------------------------------------------------------------------------------------------------------------------------------------------------------------------------------------------------------------------------------------------------------------------------------------------------------------------------------------------------------------------------------------------------------------------------------------------------------------------------------------------------------------------------------------------------------------------------------------------------------------------------------------------------------------|---------------------|-------|
| Leigh (2011)        | Decision Aid                           | Booklet with accompanying narration on audiotape or compact disc | First-line systemic chemotherapy and goals of palliative care/treatment | <p>Patient anxiety measured pre- and post-visit with STAI (ns)</p> <p>Decision involvement achieved with modified Control Preferences Scale (32% in DA and 35% in control had role that matched preference, ns)</p> <p>Patient understanding, higher increase in understanding in DA group (16%) as compared to control group (5%), <math>p &lt; .001</math></p> <p>Decisional conflict with Decisional Conflict Scale, median in both groups 26/100 (ns)</p> <p>Patient satisfaction with decision, median 22/25 (DA group) 21/25 (control group), ns</p> <p>Patient satisfaction with consultation, median 98/125 (DA group) and 99/125 (control group), ns</p> <p>Patient quality of life, measured with FACT-G (ns)</p> <p>Physician satisfaction with decision making, high satisfaction (24/30 in both groups, ns)</p> |                     | 60%   |

| First author (Year) | Tool for supporting treatment decision | Tool description                                                                                                            | Treatment decision                    | Effectiveness of tool | Feasibility of tool                                                                                                                                                                                                                                                                                                                                                                                                                                                                                                                                                                                                                                                                                                                                 | MMAT* |
|---------------------|----------------------------------------|-----------------------------------------------------------------------------------------------------------------------------|---------------------------------------|-----------------------|-----------------------------------------------------------------------------------------------------------------------------------------------------------------------------------------------------------------------------------------------------------------------------------------------------------------------------------------------------------------------------------------------------------------------------------------------------------------------------------------------------------------------------------------------------------------------------------------------------------------------------------------------------------------------------------------------------------------------------------------------------|-------|
| Hollen (2013)       | Decision aid                           | Booklet consisting of decision guide and 10 decisional balance sheets, used in interactive process with physician and nurse | Cancer treatment option               |                       | <p>In patients with advanced prostate or lung cancer:</p> <p>Decision aid considered feasible: &lt;3 min to learn (67% prostate, 83% lung), easy to use (100% both), easy to read (92% prostate, 100% lung), time acceptable (92% prostate, 100% lung)</p> <p>Components of DA considered helpful by 83% (prostate) to 100% (lung) patients</p> <p>Helpful in sorting through information (83-100%), weighing treatment choices (83-88%), speaking about personal values with doctor or nurse (75-50%), discussing choices with support (82-75%)</p> <p>Helpful for patient at arriving at decision, 80% (prostate cancer) and 63% (lung cancer)</p> <p>Helpful for patient in sharing in decision making, 70% (prostate cancer) and 63% (lung)</p> | 40%   |
| Walczak (2013)      | QPL                                    | 3 page booklet containing questions that patients can ask their clinician                                                   | End-of-life treatment and care issues | N/A                   | <p>QPL considered comprehensive, acceptable and useful by patients and professionals</p> <p>Separate versions for Australia and US (tailored to individual populations)</p>                                                                                                                                                                                                                                                                                                                                                                                                                                                                                                                                                                         | 80%   |

| First author (Year) | Tool for supporting treatment decision                 | Tool description                                                                                                                            | Treatment decision                                                                                                 | Effectiveness of tool                                                                                                                                                                                                                                                                                                                                                                                                                               | Feasibility of tool                                                                                                                                                                                                                                                              | MMAT* |
|---------------------|--------------------------------------------------------|---------------------------------------------------------------------------------------------------------------------------------------------|--------------------------------------------------------------------------------------------------------------------|-----------------------------------------------------------------------------------------------------------------------------------------------------------------------------------------------------------------------------------------------------------------------------------------------------------------------------------------------------------------------------------------------------------------------------------------------------|----------------------------------------------------------------------------------------------------------------------------------------------------------------------------------------------------------------------------------------------------------------------------------|-------|
| Yeh (2014)          | QPL                                                    | One-page checklist of questions and issues in cancer care, quality of life/end of life                                                      | Cancer care and treatment option                                                                                   | <p>Patient anxiety measured pre- and post-visit with SSAI (median 46.0 and 39.6 respectively, <math>p &lt; .005</math>)</p> <p>Patients satisfaction with consultation measured with Patient Satisfaction with Consultation scale (median 111.5 = high, range 25-125)</p>                                                                                                                                                                           | <p>Patients found QPL easy to understand, relevant and helpful to themselves and partners.</p> <p>Physicians: no negative impact on workflow or consultation length. No sharing of QPL</p>                                                                                       | 60%   |
| Walczak (2015)      | Communication support program (CSP) with QPL           | CSP: nurse led, consisting of a face-to-face meeting (60- to 90- minutes) and a follow-up phone call; QPL: 3 page booklet with questions    | treatment option/ decisions, palliative care and advanced care planning                                            |                                                                                                                                                                                                                                                                                                                                                                                                                                                     | <p>65,5% of patients intent to use QPL</p> <p>Intention related to information needs, involvement in care, readiness to discuss end of life issues</p> <p>Improvement of communication about end of life care preferences and competence of patients in the oncology setting</p> | 80%   |
| Walczak (2017)      | Communication support program (CSP) with QPL and a DVD | CSP: nurse-led, consisting of face to face meeting (45 minutes) and telephone session (15 minutes). QPL: 3 page booklet DVD: discussing ACP | Cancer prognosis, treatment options and decisions, palliative care, caregiver specific issues and end-of-life care | <p>Number of questions and cues asked – more cues for discussion in CSP group than control group (<math>\beta = 0.417</math>; <math>p &lt; .001</math>)</p> <p>Mean patient communication self-efficacy, measured with Perceived Efficacy in Physician/Patient Interactions (max score 25), decreased in control group (20.5 baseline to 20.3 follow up) and increased in intervention group (20.2 baseline to 21.4 follow up), not significant</p> | <p>Consultation length 20,6 and 20,4 min for CSP and control, resp (NS)</p>                                                                                                                                                                                                      | 60%   |

| First author (Year) | Tool for supporting treatment decision                                             | Tool description                                                                                                                | Treatment decision                                                                                | Effectiveness of tool                                                                                                                                                                                                                                                                                                                                                                                                            | Feasibility of tool                                                                                                                                                                                                                                           | MMAT* |
|---------------------|------------------------------------------------------------------------------------|---------------------------------------------------------------------------------------------------------------------------------|---------------------------------------------------------------------------------------------------|----------------------------------------------------------------------------------------------------------------------------------------------------------------------------------------------------------------------------------------------------------------------------------------------------------------------------------------------------------------------------------------------------------------------------------|---------------------------------------------------------------------------------------------------------------------------------------------------------------------------------------------------------------------------------------------------------------|-------|
|                     |                                                                                    |                                                                                                                                 |                                                                                                   | <p>Preferences for information and involvement in decision-making with Control Preferences Scale – no sign difference between groups</p> <p>Health-related quality of life with FACT-G: lower total score in intervention group (70.9) as compared to control group (77.8) at follow up, not significant</p> <p>High satisfaction with meeting and phone call, measured with developed survey: both 3.9 to 4.2 (out of five)</p> |                                                                                                                                                                                                                                                               |       |
| Henselmans (2019)   | Patient communication aid (PCA) including QPL and value clarification method (VCM) | <p>PCA: 36 page brochure containing information about SDM, QPL and VCM,</p> <p>VCM including narratives of fictive patients</p> | Palliative systemic treatment, start of new treatment, or (dis) continuation of current treatment |                                                                                                                                                                                                                                                                                                                                                                                                                                  | <p>Patient Communication Aid mentioned in 7/17 consults</p> <p>Patients: PCA facilitates question asking, provides control over information</p> <p>Communication aid did not support decision making.</p> <p>Perceived median helpful (score 3 out of 5).</p> | 40%   |

Abbreviations: CSP= Communication Support Program, DA= Decision Aid, MMAT= Mixed Method Appraisal Tool, N/A = Not Applicable, ns=not significant, PCA= Patient Communication Aid, QPL= Question Prompt List, SDM= Shared Decision Making, STAI= State-Trait Anxiety Inventory, FACT-G= Functional Assessment of Cancer Therapy – General, VCM= Value clarification method

\*scores on MMAT indicate the percentage of items met, ranging from 0% (none of the criteria are met) to 100% (all 5 criteria are met)
